# Supplementary material for: Magnesium stable isotope composition, but not concentration, responds to obesity and early insulin-resistant conditions in minipig
Source: PubMed Central journal article supplement (PMC9243132; doi:10.1038/s41598-022-14825-3), 2022-06-29
Supplement: 41598_2022_14825_MOESM1_ESM.pdf [file 41598_2022_14825_MOESM1_ESM.pdf]

Supplementary information for

**Magnesium stable isotope composition, but not concentration, responds to obesity and early insulin-resistant conditions in minipigs**

Samuel le Goff, Jean-Philippe Godin, Emmanuelle Albalat, José Manuel Ramos Nieves,  
Vincent Balter

Corresponding author: [Vincent.balter@ens-lyon1.fr](mailto:Vincent.balter@ens-lyon1.fr)

This file includes:

Supplementary Figures S1-S7

Supplementary Table S1-S5

Supplementary Reference S1

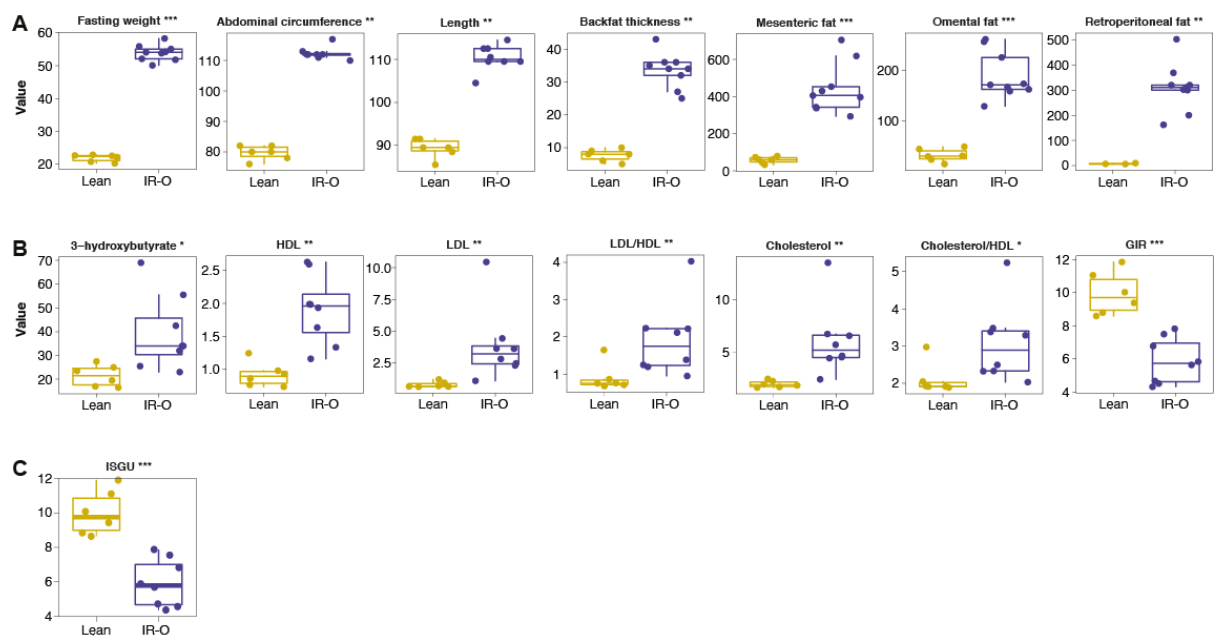

**Figure S1: Boxplots for significantly different phenotypes.** A) Clinical phenotypes. B) Molecular phenotypes. C) Clamp values. ISGU stands for insulin-stimulated systemic glucose utilization. Gold and dark blue stand for lean and IR-O minipigs, respectively.  $P$  values for Wilcoxon test are given: \*\*\* $P < 0.001$ , \*\* $P < 0.01$ , \* $P < 0.05$ .

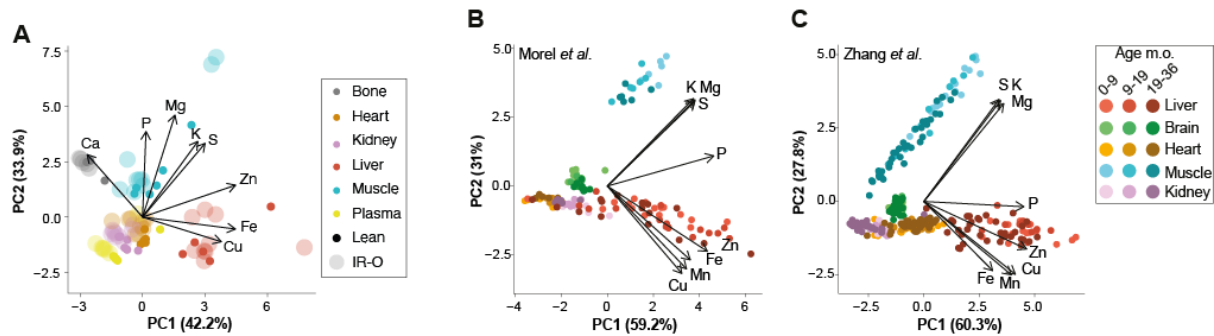

**Figure S2: PCA analysis of the metallome in the minipig and the mouse models.** A) PCA analysis of the present study in minipigs. B) PCA analysis in mice from Morel et al. (45). C) PCA analysis in mice from Zhang et al. (44). Data are normalized to Na for comparison.

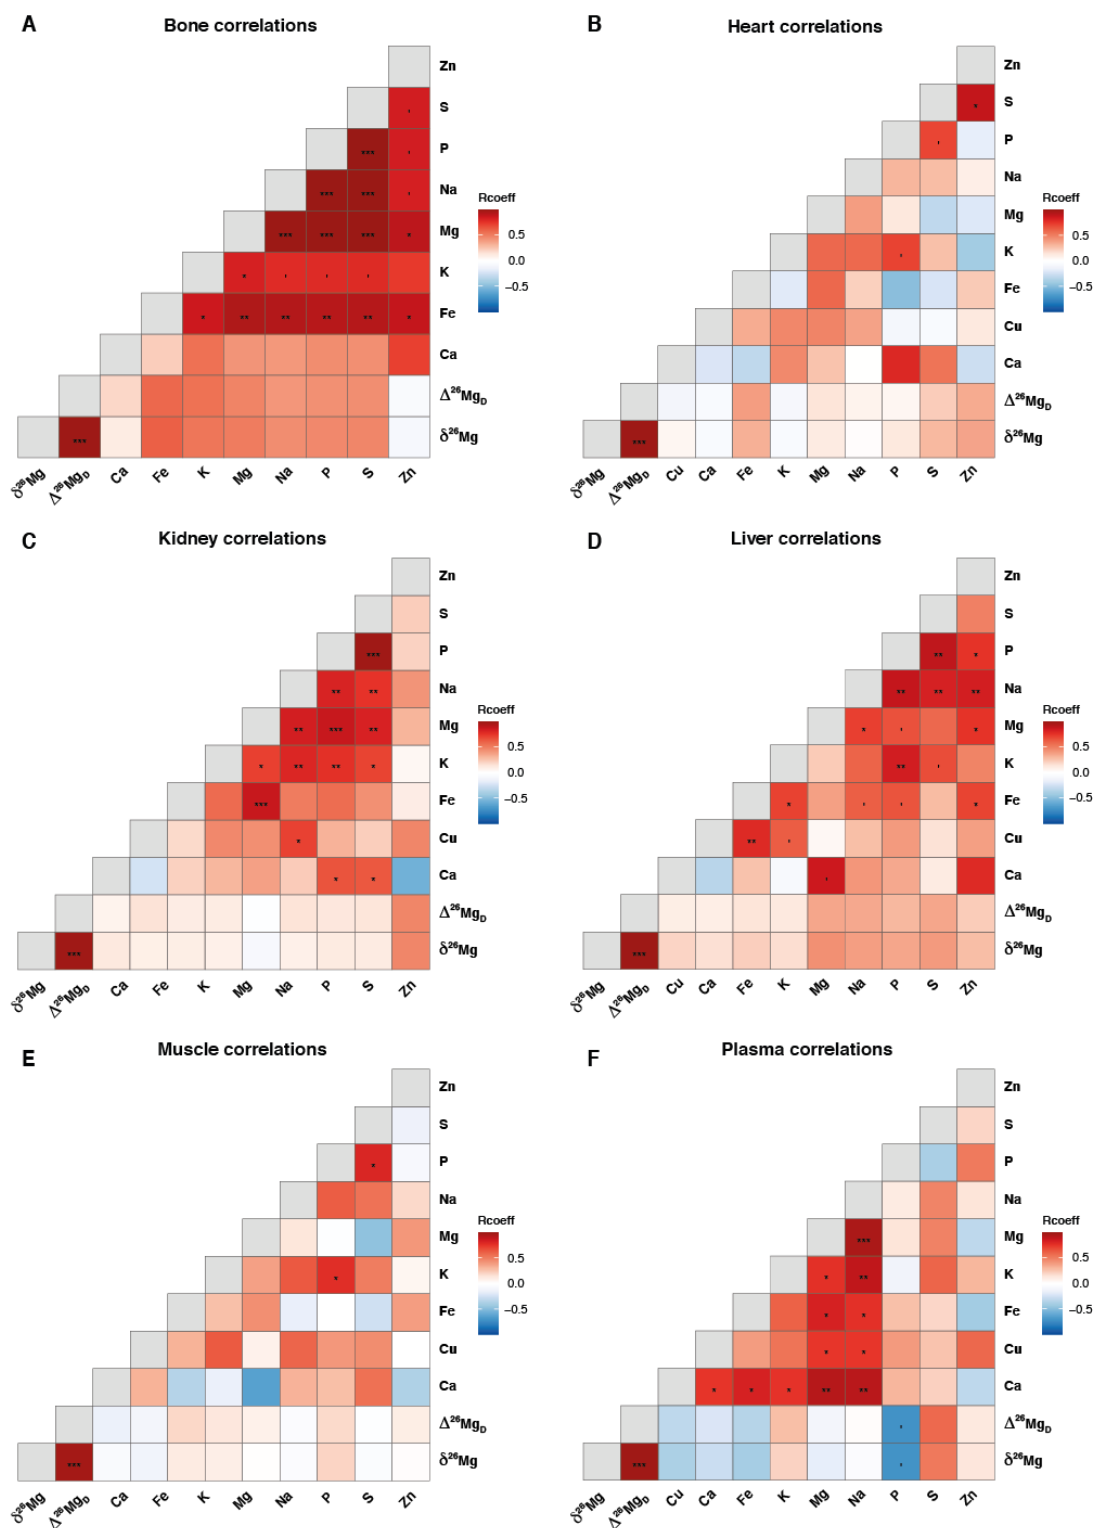

**Figure S3: Heatmap of Spearman Rho coefficients of correlations between the metallome and the Mg isotope compositions in organs.** Adjusted  $P$  value for multiple testing with the Benjamini & Hochberg correction are given: \*\*\*Adj. $P$  < 0.001, \*\*Adj. $P$  < 0.01, \*Adj. $P$  < 0.05, 'Adj. $P$  < 0.1.

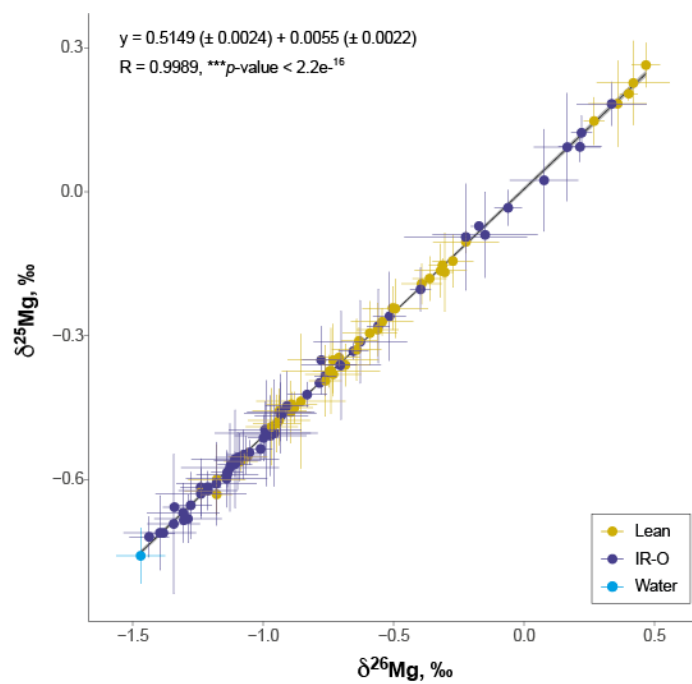

**Figure S4: Mass fractionation in three-isotope space of the results.** The slope of the regression line is 0.515, lying between the theoretical kinetically controlled (0.511) and thermodynamically controlled (0.521) values (ref S1)

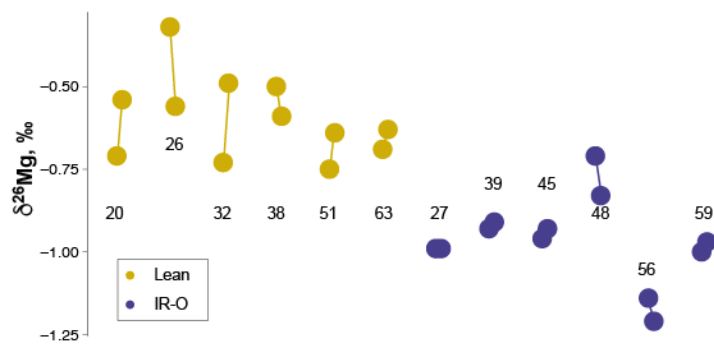

**Figure S5: Dot plot of the values of plasma.** The samples were collected 30 and 10 min before hyperinsulinemic-euglycemic clamp. ID of the animals are indicated.

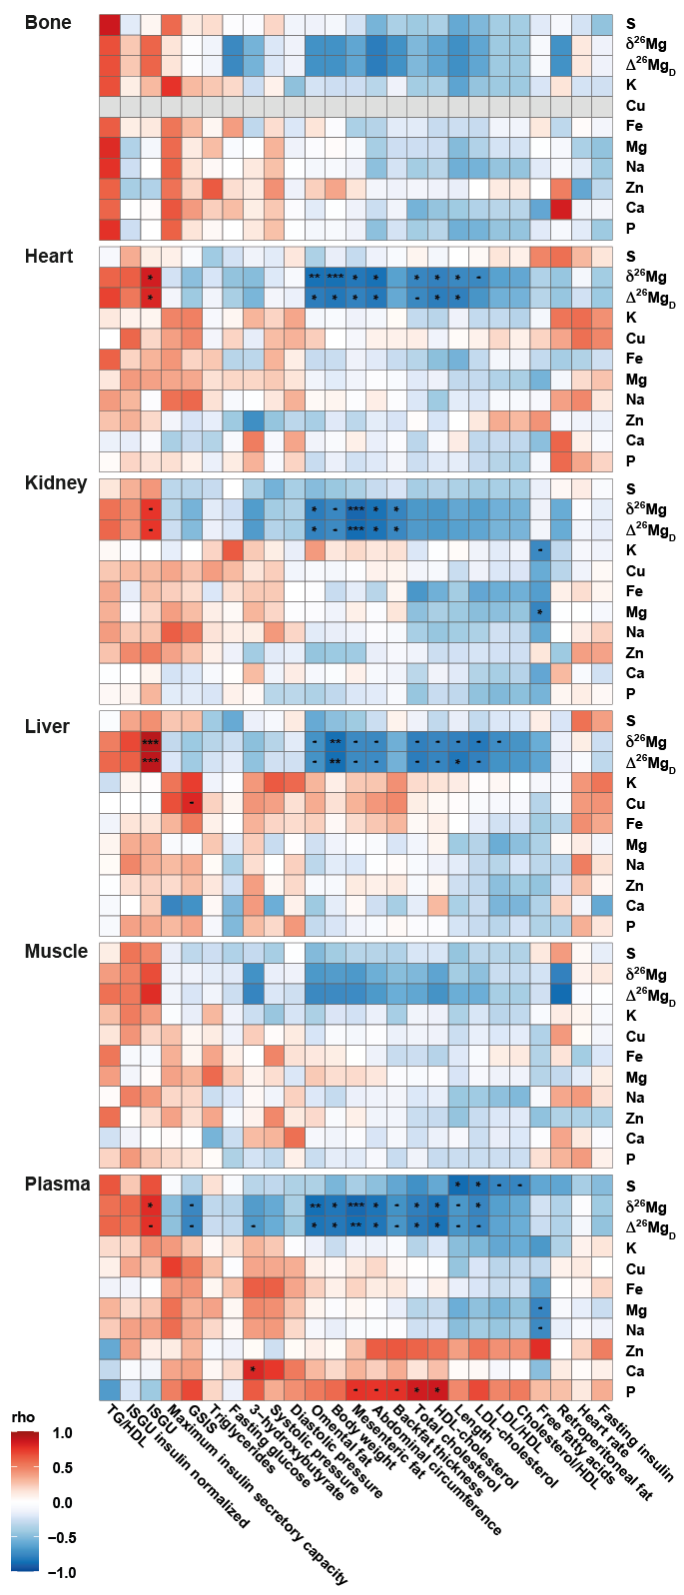

**Figure S6: Heatmap of Spearman Rho coefficients of correlations between the metallome and the Mg isotope compositions, and phenotypes in organs.** Adjusted  $P$  value for multiple testing with the Benjamini & Hochberg correction are given: \*\*\*Adj. $P < 0.001$ , \*\*Adj. $P < 0.01$ , \*Adj. $P < 0.05$ , 'Adj. $P < 0.1$ .

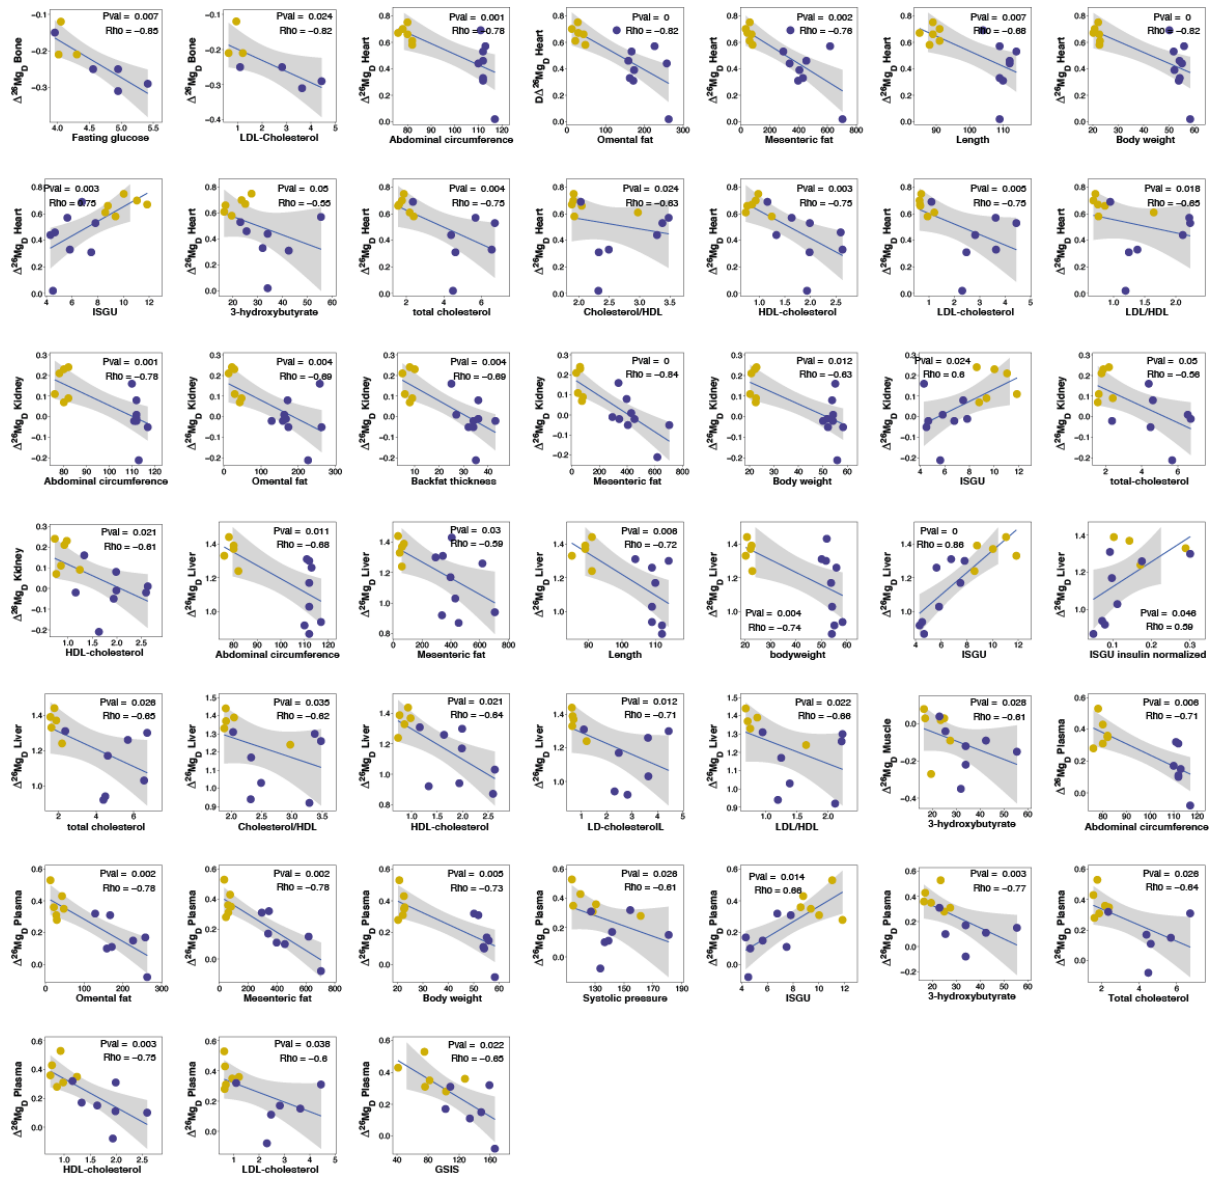

**Figure S7: Scatterplots for significant correlations between the  $\Delta^{26}\text{Mg}_D$  values and phenotypes.** Some correlations are spurious, notably concerning morphological phenotypes (e.g., fasting weight, length or abdominal circumference) because they are driven by only two groups of clustered values. Gold and dark blue stand for lean and IRO minipigs, respectively. Spearman Rho coefficients and associated  $P$  value are given:  $***P < 0.001$ ,  $**P < 0.01$ ,  $*P < 0.05$ .



**Table S1: Phenotypes values of Göttingen minipigs**

| Ind | Status | Abdominal circumference | Omental fat | Retroperitoneal fat | Backfat thickness | Mesenteric fat | Body length | Body weight | Systolic blood pressure | Diastolic blood pressure | Heart rate | Insulin-stimulated systemic glucose utilization (ISGU) | GIR insulin normalized | 3-hydroxybutyrate | Total cholesterol | Total cholesterol:HDL ratio | Free fatty acids | Fasting glucose | Fasting insulin | HDL-cholesterol | LDL-cholesterol | LDL:HDL ratio | Triglycerides | TG:HDL ratio | Glucose-stimulated insulin secretory capacity (GSIS) | Maximum insulin secretory capacity |
|-----|--------|-------------------------|-------------|---------------------|-------------------|----------------|-------------|-------------|-------------------------|--------------------------|------------|--------------------------------------------------------|------------------------|-------------------|-------------------|-----------------------------|------------------|-----------------|-----------------|-----------------|-----------------|---------------|---------------|--------------|------------------------------------------------------|------------------------------------|
| 20  | Lean   | 82                      | 48          | 9.4                 | 9                 | 80             | 88          | 23          | 115                     | 74                       | 87         | 9.4                                                    | 0.11                   | 20                | 2.395             | 1.92                        | 0.50             | 4.1             | 14.0            | 1.25            | 0.95            | 0.76          | 0.35          | 0.28         | 82                                                   | 199                                |
| 26  | Lean   | 78                      | 13          |                     | 5                 | 33             | 91          | 21          | 114                     | 101                      | 135        | 11.1                                                   | 0.48                   | 24                | 1.775             | 1.91                        | 0.30             | 4.0             | 16.9            | 0.93            | 0.63            | 0.68          | 0.20          | 0.21         | 75                                                   | 81                                 |
| 38  | Lean   | 80                      | 43          | 6.2                 | 8                 | 74             | 89          | 23          | 120                     | 72                       | 57         | 8.8                                                    | 0.10                   | 17                | 1.565             | 2.05                        | 0.20             | 4.7             | 1.2             | 0.77            | 0.66            | 0.86          | 0.35          | 0.45         | 41                                                   | 81                                 |
| 32  | Lean   | 82                      | 22          |                     | 8                 | 60             | 91          | 23          | 131                     | 87                       | 106        | 8.6                                                    | 0.17                   | 17                | 2.185             | 2.97                        | 0.35             | 4.3             | 17.8            | 0.74            | 1.21            | 1.65          | 0.39          | 0.52         | 127                                                  | 231                                |
| 51  | Lean   | 76                      | 29          |                     | 6                 | 45             | 85          | 20          | 162                     | 122                      | 102        | 11.9                                                   | 0.29                   | 25                | 1.620             | 1.88                        | 0.30             | 4.9             | 16.9            | 0.86            | 0.65            | 0.75          | 0.24          | 0.27         | 103                                                  | 202                                |
| 63  | Lean   | 80                      | 28          | 5.7                 | 10                | 61             | 89          | 22          | 128                     | 84                       | 82         | 10.0                                                   | 0.14                   | 28                | 1.875             | 1.91                        | 0.25             | 4.6             | 9.7             | 0.98            | 0.70            | 0.71          | 0.42          | 0.42         | 76                                                   | 173                                |
| 16  | Obese  |                         | 174         |                     | 321               | 32             | 406         |             | 52                      |                          |            |                                                        |                        |                   |                   |                             |                  |                 |                 |                 |                 |               |               |              |                                                      |                                    |
| 22  | Obese  | 112                     | 167         | 303                 | 36                | 294            | 114         | 52          | 127                     | 93                       | 115        | 7.8                                                    | 0.30                   | 23                | 6.720             | 3.38                        | 0.65             | 5.4             | 21.0            | 1.99            | 4.44            | 2.23          | 0.24          | 0.12         | 109                                                  | 128                                |
| 27  | Obese  | 112                     | 159         | 163                 | 34                | 453            | 112         | 54          | 137                     | 94                       | 78         | 4.7                                                    | 0.05                   | 26                | 13.590            | 5.24                        | 0.80             | 4.0             |                 | 2.60            | 10.45           | 4.03          | 0.36          | 0.14         |                                                      |                                    |
| 34  | Obese  | 112                     | 162         | 370                 | 27                | 430            | 109         | 54          | 114                     | 77                       | 75         | 5.8                                                    | 0.11                   | 32                | 6.555             | 2.49                        | 0.35             | 5.0             | 12.8            | 2.63            | 3.64            | 1.38          | 0.40          | 0.15         | 71                                                   | 98                                 |
| 39  | Obese  | 110                     | 258         | 321                 | 25                | 338            | 112         | 55          | 142                     | 113                      | 106        | 4.3                                                    | 0.08                   | 34                | 4.390             | 3.29                        | 0.45             | 5.0             | 15.6            | 1.34            | 2.82            | 2.11          | 0.28          | 0.21         | 102                                                  | 133                                |
| 45  | Obese  | 113                     | 226         | 311                 | 35                | 618            | 109         | 56          | 181                     | 128                      | 85         | 5.6                                                    | 0.18                   | 56                | 5.690             | 3.48                        | 0.25             | 4.5             | 7.7             | 1.64            | 3.63            | 2.22          | 0.43          | 0.26         | 148                                                  | 245                                |
| 48  | Obese  | 111                     | 129         | 504                 | 43                | 343            | 104         | 50          | 154                     | 108                      | 113        | 6.8                                                    | 0.09                   | 69                | 2.355             | 2.03                        | 0.35             | 4.6             | 20.2            | 1.16            | 1.10            | 0.95          | 0.20          | 0.17         | 159                                                  | 321                                |
| 56  | Obese  | 117                     | 263         | 301                 | 34                | 704            | 109         | 58          | 134                     | 94                       | 108        | 4.5                                                    | 0.07                   | 34                | 4.490             | 2.32                        | 0.30             | 5.2             | 19.5            | 1.94            | 2.31            | 1.19          | 0.45          | 0.23         | 166                                                  | 228                                |
| 59  | Obese  | 112                     | 171         | 201                 | 36                | 397            | 110         | 54          | 139                     | 89                       | 109        | 7.5                                                    | 0.10                   | 43                | 4.620             | 2.33                        | 0.30             | 4.8             | 24.5            | 1.99            | 2.48            | 1.25          | 0.24          | 0.12         | 134                                                  | 216                                |

**Table S2: Mg isotope composition and metallomic values of Göttingen minipigs**

| Ind | Status | Organ  | $\delta^{26}\text{Mg}$ | $\pm 2\text{SD}$ | $\delta^{25}\text{Mg}$ | $\pm 2\text{SD}$ | n | Ca    | Cu  | Fe   | K     | Mg   | Na   | P     | S     | Zn   |
|-----|--------|--------|------------------------|------------------|------------------------|------------------|---|-------|-----|------|-------|------|------|-------|-------|------|
| 20  | Lean   | Bone   | -1.09                  | 0.06             | -0.56                  | 0.02             | 3 | 1118  |     | 11   | 148   | 1992 | 2391 | 37781 | 580   | 273  |
| 26  | Lean   | Bone   | -1.18                  | 0.11             | -0.60                  | 0.07             | 3 | 1045  |     | 2    | 51    | 763  | 991  | 17237 | 262   | 26   |
| 32  | Lean   | Bone   | -1.18                  | 0.06             | -0.63                  | 0.04             | 3 | 1262  |     | 4    | 113   | 1155 | 1292 | 21920 | 334   | 41   |
| 22  | Obese  | Bone   | -1.38                  | 0.04             | -0.71                  | 0.01             | 2 | 897   |     | 3    | 67    | 734  | 941  | 15361 | 233   | 29   |
| 27  | Obese  | Bone   | -1.24                  | 0.08             | -0.62                  | 0.06             | 2 | 881   |     | 2    | 50    | 784  | 979  | 15896 | 244   | 30   |
| 34  | Obese  | Bone   | -1.40                  | 0.14             | -0.71                  | 0.08             | 2 | 1176  |     | 2    | 79    | 910  | 1198 | 19834 | 304   | 35   |
| 39  | Obese  | Bone   | -1.34                  | 0.04             | -0.66                  | 0.01             | 2 | 1127  |     | 4    | 69    | 1446 | 1793 | 29145 | 443   | 41   |
| 48  | Obese  | Bone   | -1.34                  | 0.10             | -0.69                  | 0.15             | 2 | 1196  |     | 3    | 83    | 1030 | 1348 | 22037 | 330   | 33   |
| 20  | Lean   | Heart  | -0.39                  | 0.08             | -0.19                  | 0.04             | 5 | 14    | 27  | 333  | 13731 | 1037 | 3673 | 8964  | 9057  | 111  |
| 26  | Lean   | Heart  | -0.27                  | 0.08             | -0.14                  | 0.05             | 5 | 1036  | 24  | 257  | 15750 | 1230 | 3709 | 11840 | 9653  |      |
| 32  | Lean   | Heart  | -0.36                  | 0.06             | -0.18                  | 0.05             | 4 | 19    | 28  | 333  | 16558 | 1230 | 4930 | 10971 | 10195 | 119  |
| 38  | Lean   | Heart  | -0.31                  | 0.05             | -0.15                  | 0.01             | 3 | 97    | 18  | 338  | 11796 | 1017 | 3490 | 8947  | 8196  | 87   |
| 51  | Lean   | Heart  | -0.30                  | 0.03             | -0.17                  | 0.08             | 2 |       | 28  | 394  | 15445 | 1381 | 3603 | 9920  | 8271  | 33   |
| 63  | Lean   | Heart  | -0.22                  | 0.13             | -0.10                  | 0.02             | 2 | 21    | 23  | 285  | 15719 | 1263 | 3564 | 10080 | 7411  | 15   |
| 16  | Obese  | Heart  | -0.70                  | 0.15             | -0.36                  | 0.11             | 2 |       | 36  | 526  | 16099 | 2518 | 3685 | 9954  | 8007  | 1722 |
| 22  | Obese  | Heart  | -0.56                  | 0.04             | -0.28                  | 0.08             | 5 | 17    | 28  | 284  | 14096 | 1063 | 3614 | 9404  | 9380  | 107  |
| 27  | Obese  | Heart  | -0.63                  | 0.18             | -0.31                  | 0.09             | 3 | 94    | 19  | 323  | 12439 | 975  | 2324 | 8770  | 8243  | 84   |
| 34  | Obese  | Heart  | -0.76                  | 0.04             | -0.38                  | 0.04             | 5 | 609   | 19  | 221  | 15073 | 1163 | 3487 | 12022 | 10135 |      |
| 39  | Obese  | Heart  | -0.65                  | 0.06             | -0.33                  | 0.02             | 3 | 96    | 9   | 161  | 5583  | 470  | 923  | 4312  | 4079  | 43   |
| 45  | Obese  | Heart  | -0.52                  | 0.06             | -0.26                  | 0.09             | 2 |       | 28  | 367  | 14983 | 1255 | 3986 | 9511  | 8788  | 67   |
| 48  | Obese  | Heart  | -0.40                  | 0.04             | -0.20                  | 0.05             | 5 | 698   | 23  | 291  | 17200 | 1038 | 3773 | 12948 | 10616 |      |
| 56  | Obese  | Heart  | -1.07                  | 0.00             | -0.55                  | 0.04             | 2 |       | 24  | 318  | 15917 | 1258 | 4502 | 9800  | 7403  | 12   |
| 59  | Obese  | Heart  | -0.78                  | 0.02             | -0.40                  | 0.00             | 2 |       | 26  | 250  | 15293 | 1289 | 3084 | 9674  | 7521  | 25   |
| 20  | Lean   | Kidney | -0.88                  | 0.07             | -0.45                  | 0.03             | 5 | 23    | 63  | 254  | 10524 | 846  | 5025 | 10401 | 7592  | 119  |
| 26  | Lean   | Kidney | -0.76                  | 0.06             | -0.39                  | 0.07             | 5 | 1179  | 46  | 282  | 11225 | 960  | 6873 | 16144 | 10171 |      |
| 32  | Lean   | Kidney | -0.73                  | 0.11             | -0.38                  | 0.04             | 5 | 26    | 103 | 261  | 9942  | 933  | 8543 | 12154 | 8393  | 149  |
| 38  | Lean   | Kidney | -0.90                  | 0.08             | -0.46                  | 0.07             | 3 | 977   | 66  | 338  | 14498 | 1186 | 7607 | 16638 | 11170 | 30   |
| 51  | Lean   | Kidney | -0.86                  | 0.17             | -0.44                  | 0.14             | 2 | 177   | 139 | 294  | 11574 | 1019 | 9149 | 12138 | 7507  | 88   |
| 63  | Lean   | Kidney | -0.74                  | 0.19             | -0.37                  | 0.09             | 3 | 141   | 192 | 334  | 12210 | 1077 | 7598 | 12305 | 7501  | 131  |
| 16  | Obese  | Kidney | -1.14                  | 0.06             | -0.58                  | 0.04             | 2 | 174   | 56  | 363  | 11989 | 1057 | 6003 | 11591 | 7387  | 65   |
| 22  | Obese  | Kidney | -1.10                  | 0.09             | -0.56                  | 0.06             | 5 | 24    | 87  | 224  | 11617 | 826  | 6476 | 11762 | 8705  | 128  |
| 27  | Obese  | Kidney | -1.11                  | 0.17             | -0.56                  | 0.10             | 3 | 105   | 29  | 172  | 3007  | 329  | 1274 | 4099  | 3299  | 45   |
| 34  | Obese  | Kidney | -1.08                  | 0.07             | -0.55                  | 0.05             | 5 | 726   | 89  | 200  | 11563 | 887  | 6745 | 15009 | 9987  | 38   |
| 39  | Obese  | Kidney | -0.93                  | 0.10             | -0.47                  | 0.02             | 2 | 84    | 14  | 49   | 1451  | 189  | 838  | 2484  | 1785  | 29   |
| 45  | Obese  | Kidney | -1.30                  |                  | -0.68                  |                  | 1 | 255   | 136 | 258  | 12180 | 1068 | 8225 | 11596 | 7482  | 41   |
| 48  | Obese  | Kidney | -1.11                  | 0.07             | -0.57                  | 0.03             | 5 | 608   | 61  | 416  | 11100 | 1611 | 7773 | 16542 | 10532 | 410  |
| 56  | Obese  | Kidney | -1.14                  | 0.16             | -0.60                  | 0.06             | 2 | 307   | 126 | 297  | 12455 | 1125 | 8485 | 12334 | 7550  | 108  |
| 59  | Obese  | Kidney | -1.01                  | 0.04             | -0.54                  | 0.02             | 2 | 145   | 161 | 325  | 13116 | 1036 | 8007 | 12382 | 7382  | 86   |
| 26  | Lean   | Liver  | 0.47                   | 0.05             | 0.26                   | 0.05             | 4 | 442   | 28  | 1465 | 8770  | 2310 | 3744 | 14240 | 8723  | 801  |
| 32  | Lean   | Liver  | 0.27                   | 0.04             | 0.15                   | 0.05             | 4 | 17    | 35  | 818  | 7674  | 699  | 2591 | 10592 | 7720  | 268  |
| 38  | Lean   | Liver  | 0.42                   | 0.14             | 0.23                   | 0.09             | 2 | 94    | 19  | 767  | 4791  | 424  | 598  | 6770  | 4708  | 172  |
| 51  | Lean   | Liver  | 0.36                   | 0.11             | 0.18                   | 0.09             | 3 |       | 31  | 969  | 10399 | 817  | 2253 | 11374 | 6618  | 391  |
| 63  | Lean   | Liver  | 0.40                   | 0.03             | 0.20                   | 0.01             | 2 |       | 47  | 1708 | 8514  | 1258 | 3555 | 12013 | 7041  | 893  |
| 16  | Obese  | Liver  | 0.34                   | 0.13             | 0.18                   | 0.05             | 2 |       | 84  | 1704 | 9258  | 814  | 1244 | 9969  | 5196  | 400  |
| 22  | Obese  | Liver  | 0.21                   | 0.08             | 0.09                   | 0.03             | 4 | 15    | 38  | 1362 | 9087  | 602  | 2365 | 10280 | 7005  | 317  |
| 27  | Obese  | Liver  | -0.22                  | 0.24             | -0.09                  | 0.11             | 3 | 104   | 23  | 844  | 9097  | 636  | 1388 | 10850 | 6937  | 363  |
| 34  | Obese  | Liver  | -0.06                  | 0.05             | -0.03                  | 0.04             | 3 | 322   | 17  | 621  | 4274  | 955  | 1329 | 6959  | 3884  | 345  |
| 39  | Obese  | Liver  | -0.17                  | 0.03             | -0.07                  | 0.01             | 2 | 91    | 18  | 749  | 4801  | 376  | 781  | 6600  | 4121  | 147  |
| 45  | Obese  | Liver  | 0.17                   | 0.13             | 0.09                   | 0.11             | 2 |       | 51  | 1472 | 9750  | 832  | 2821 | 12252 | 6619  | 654  |
| 48  | Obese  | Liver  | 0.22                   | 0.04             | 0.12                   | 0.04             | 4 | 52166 | 46  | 875  | 33921 | 7656 | 9786 | 30878 | 8247  | 403  |
| 56  | Obese  | Liver  | -0.15                  | 0.20             | -0.09                  | 0.09             | 2 |       | 61  | 1740 | 9332  | 846  | 2578 | 10680 | 6015  | 664  |
| 59  | Obese  | Liver  | 0.08                   | 0.13             | 0.02                   | 0.11             | 2 |       | 54  | 1740 | 10992 | 779  | 2607 | 12167 | 6673  | 430  |
| 20  | Lean   | Muscle | -1.24                  | 0.06             | -0.62                  | 0.03             | 3 | 17    | 8   | 79   | 15286 | 1143 | 1942 | 8614  | 9845  | 195  |
| 26  | Lean   | Muscle | -0.95                  | 0.09             | -0.48                  | 0.06             | 5 | 506   | 14  | 67   | 16169 | 901  | 2036 | 9308  | 10854 | 105  |
| 32  | Lean   | Muscle | -0.89                  | 0.10             | -0.44                  | 0.03             | 4 | 13    | 14  | 192  | 17160 | 1169 | 1556 | 8684  | 8514  | 124  |
| 38  | Lean   | Muscle | -0.94                  | 0.12             | -0.48                  | 0.05             | 2 | 97    | 5   | 109  | 12365 | 965  | 738  | 6974  | 8027  | 175  |
| 51  | Lean   | Muscle | -0.94                  | 0.10             | -0.46                  | 0.05             | 2 | 132   | 13  | 137  | 15077 | 1155 | 1865 | 7457  | 8745  | 244  |
| 63  | Lean   | Muscle | -1.06                  | 0.07             | -0.55                  | 0.02             | 2 | 3     | 9   | 356  | 15564 | 1325 | 1334 | 7431  | 7572  | 179  |
| 16  | Obese  | Muscle | -1.29                  | 0.13             | -0.68                  | 0.05             | 3 | 68    | 9   | 150  | 15504 | 1256 | 1787 | 8161  | 8469  | 239  |
| 22  | Obese  | Muscle | -1.05                  | 0.05             | -0.54                  | 0.03             | 5 | 12    | 5   | 32   | 14275 | 943  | 1661 | 7489  | 8040  | 106  |
| 27  | Obese  | Muscle | -1.13                  | 0.19             | -0.57                  | 0.09             | 3 | 99    | 4   | 94   | 12937 | 965  | 515  | 7336  | 7751  | 132  |
| 34  | Obese  | Muscle | -1.44                  | 0.08             | -0.72                  | 0.04             | 5 | 810   | 18  | 102  | 16639 | 1016 | 1692 | 10384 | 10346 | 89   |
| 39  | Obese  | Muscle | -1.31                  | 0.14             | -0.67                  | 0.06             | 3 | 92    | 6   | 133  | 12594 | 967  | 490  | 7019  | 7347  | 133  |
| 45  | Obese  | Muscle | -1.24                  | 0.17             | -0.63                  | 0.05             | 3 | 73    | 15  | 127  | 14994 | 1071 | 1816 | 7678  | 8492  | 283  |
| 48  | Obese  | Muscle | -1.28                  | 0.08             | -0.65                  | 0.07             | 5 | 677   | 12  | 76   | 13042 | 737  | 1941 | 7688  | 9262  | 111  |
| 56  | Obese  | Muscle | -1.21                  | 0.04             | -0.62                  | 0.00             | 2 | 62    | 8   | 98   | 15179 | 1429 | 1736 | 7956  | 7536  | 170  |
| 59  | Obese  | Muscle | -1.18                  | 0.15             | -0.61                  | 0.09             | 4 | 72    | 14  | 118  | 13697 | 1347 | 1506 | 6916  | 6291  | 139  |

**Table S2: continued**

| Ind | Status | Organ    | $\delta^{26}\text{Mg}$ | $\pm 2\text{SD}$ | $\delta^{25}\text{Mg}$ | $\pm 2\text{SD}$ | n | Ca   | Cu | Fe | K     | Mg  | Na    | P    | S     | Zn |
|-----|--------|----------|------------------------|------------------|------------------------|------------------|---|------|----|----|-------|-----|-------|------|-------|----|
| 20  | Lean   | plasma-1 | -0.71                  | 0.08             | -0.35                  | 0.02             | 5 | 51   | 38 | 17 | 19820 | 210 | 32559 | 1329 | 10072 | 13 |
| 20  | Lean   | plasma-2 | -0.54                  | 0.12             | -0.27                  | 0.03             | 3 | 46   | 38 | 18 | 19744 | 214 | 34044 | 1364 | 10043 | 14 |
| 26  | Lean   | plasma-1 | -0.32                  | 0.10             | -0.16                  | 0.06             | 4 |      |    |    |       |     |       |      |       |    |
| 26  | Lean   | plasma-2 | -0.56                  | 0.08             | -0.29                  | 0.06             | 3 |      |    |    |       |     |       |      |       |    |
| 32  | Lean   | plasma-1 | -0.73                  | 0.17             | -0.35                  | 0.08             | 3 | 50   | 34 | 28 | 19515 | 200 | 34468 | 1094 | 9491  | 13 |
| 32  | Lean   | plasma-2 | -0.49                  | 0.13             | -0.24                  | 0.06             | 3 | 47   | 32 | 25 | 20288 | 196 | 34924 | 1135 | 9529  | 14 |
| 38  | Lean   | plasma-1 | -0.50                  | 0.02             | -0.24                  | 0.05             | 3 | 58   | 28 | 38 | 20253 | 260 | 37028 | 1078 | 11255 | 13 |
| 38  | Lean   | plasma-2 | -0.59                  | 0.10             | -0.30                  | 0.07             | 3 | 53   | 25 | 37 | 19669 | 237 | 33829 | 945  | 10170 | 13 |
| 51  | Lean   | plasma-1 | -0.75                  | 0.06             | -0.37                  | 0.03             | 4 | 1349 | 46 | 46 | 23394 | 318 | 40641 | 1219 | 10191 |    |
| 51  | Lean   | plasma-2 | -0.64                  | 0.09             | -0.33                  | 0.06             | 5 | 1384 | 44 | 44 | 23086 | 311 | 42520 | 1258 | 10302 |    |
| 63  | Lean   | plasma-1 | -0.69                  | 0.09             | -0.36                  | 0.04             | 3 | 1280 | 34 | 42 | 22592 | 282 | 38989 | 1277 | 9895  |    |
| 63  | Lean   | plasma-2 | -0.63                  | 0.07             | -0.31                  | 0.03             | 2 | 1387 | 35 | 40 | 22692 | 293 | 41189 | 1267 | 9747  |    |
| 22  | Obese  | plasma-1 | -0.78                  | 0.07             | -0.35                  | 0.07             | 3 | 51   | 32 | 19 | 17764 | 165 | 31043 | 1396 | 9353  | 14 |
| 27  | Obese  | plasma-1 | -0.99                  | 0.20             | -0.50                  | 0.11             | 2 | 70   | 34 | 34 | 16381 | 190 | 30996 | 2036 | 9213  | 14 |
| 27  | Obese  | plasma-2 | -0.99                  | 0.14             | -0.50                  | 0.06             | 2 | 49   | 27 | 34 | 16180 | 185 | 29818 | 1966 | 8929  | 14 |
| 34  | Obese  | plasma-1 | -1.12                  | 0.01             | -0.57                  | 0.02             | 2 |      |    |    |       |     |       |      |       |    |
| 39  | Obese  | plasma-1 | -0.93                  | 0.14             | -0.46                  | 0.08             | 3 | 57   | 24 | 27 | 13775 | 176 | 27246 | 1019 | 7691  | 11 |
| 39  | Obese  | plasma-2 | -0.91                  | 0.08             | -0.45                  | 0.07             | 3 | 56   | 29 | 35 | 17945 | 211 | 32491 | 1237 | 9851  | 11 |
| 45  | Obese  | plasma-1 | -0.96                  | 0.14             | -0.50                  | 0.11             | 4 | 1376 | 44 | 37 | 19757 | 296 | 41435 | 1826 | 9494  |    |
| 45  | Obese  | plasma-2 | -0.93                  | 0.13             | -0.46                  | 0.06             | 3 | 1357 | 52 | 47 | 20208 | 340 | 42032 | 1827 | 9680  |    |
| 48  | Obese  | plasma-1 | -0.71                  | 0.06             | -0.36                  | 0.01             | 2 |      |    |    |       |     |       |      |       |    |
| 48  | Obese  | plasma-2 | -0.83                  | 0.08             | -0.42                  | 0.03             | 2 |      |    |    |       |     |       |      |       |    |
| 56  | Obese  | plasma-1 | -1.14                  | 0.12             | -0.59                  | 0.03             | 5 | 1288 | 43 | 45 | 20162 | 307 | 37801 | 1573 | 9836  |    |
| 56  | Obese  | plasma-2 | -1.21                  | 0.11             | -0.62                  | 0.04             | 6 | 1300 | 41 | 41 | 20400 | 273 | 37732 | 1572 | 9892  |    |
| 59  | Obese  | plasma-1 | -1.00                  | 0.06             | -0.51                  | 0.05             | 3 | 1421 | 37 | 57 | 23736 | 284 | 41266 | 1672 | 9676  |    |
| 59  | Obese  | plasma-2 | -0.97                  | 0.14             | -0.51                  | 0.08             | 3 | 1390 | 36 | 46 | 23152 | 278 | 40543 | 1604 | 9325  |    |

**Table S3: Calculation of the whole diet Mg isotope composition.** The calculation includes Mg isotope composition and concentration in solid food and water and assumes that the water/food mass ratio for Göttingen pigs is 2.5.

Mean feed intake pellets (g/day/cage/2 pigs)

| Cage | Batch nr | Treatment | Days  |        |         |         |         |         |         |         |         |         |         |         |         |         |         |         | Total food intake (kg) | Total water intake (kg) | Total food/Mg intake (g) * | Total water/Mg intake (g) # | $\delta^{26}\text{Mg}$ intake (‰) **‡ |         |         |         |
|------|----------|-----------|-------|--------|---------|---------|---------|---------|---------|---------|---------|---------|---------|---------|---------|---------|---------|---------|------------------------|-------------------------|----------------------------|-----------------------------|---------------------------------------|---------|---------|---------|
|      |          |           | 73-86 | 87-100 | 101-114 | 115-128 | 129-142 | 143-156 | 157-170 | 171-184 | 185-198 | 199-212 | 213-226 | 227-240 | 241-254 | 255-268 | 269-282 | 283-296 |                        |                         |                            |                             |                                       | 297-310 | 311-324 | 325-331 |
| 10   | 1        | Obese     | 500   | 600    | 943     | 1000    | 1000    | 1000    | 1000    | 1000    | 1343    | 1400    | 1400    | 1400    | 1400    | 1400    | 1500    | 1600    | 1600                   | 1600                    | 1600                       | 11.6                        | 29.1                                  | 19.9    | 1.3     | -1.08   |
| 15   | 2        | Obese     | 500   | 600    | 829     | 1000    | 1000    | 1000    | 1000    | 1000    | 1343    | 1400    | 1400    | 1400    | 1400    | 1400    | 1500    | 1600    | 1600                   | 1600                    | 1600                       | 11.6                        | 29.0                                  | 19.8    | 1.3     | -1.08   |
| 20   | 2        | Obese     | 500   | 600    | 829     | 1000    | 1000    | 1000    | 1000    | 1000    | 1343    | 1400    | 1400    | 1400    | 1400    | 1400    | 1500    | 1600    | 1600                   | 1600                    | 1600                       | 11.6                        | 29.0                                  | 19.8    | 1.3     | -1.08   |
| 25   | 3        | Obese     | 500   | 600    | 914     | 1000    | 1000    | 1000    | 1000    | 1000    | 1343    | 1400    | 1400    | 1400    | 1400    | 1400    | 1500    | 1600    | 1600                   | 1600                    | 1600                       | 11.6                        | 29.1                                  | 19.9    | 1.3     | -1.08   |
| 28   | 3        | Obese     | 750   | 900    | 1371    | 1500    | 1500    | 1500    | 1500    | 1321    | 1343    | 1400    | 1400    | 1400    | 1400    | 1400    | 1500    | 1600    | 1600                   | 1600                    | 1600                       | 13.3                        | 33.2                                  | 22.7    | 1.5     | -1.08   |
| 5    | 1        | Obese     | 500   | 600    | 943     | 1000    | 1000    | 1000    | 1000    | 1000    | 1343    | 1400    | 1400    | 1400    | 1400    | 1400    | 1500    | 1600    | 1600                   | 1600                    | 1600                       | 11.6                        | 29.1                                  | 19.9    | 1.3     | -1.08   |
| 3    | 1        | Lean      | 400   | 400    | 400     | 457     | 500     | 600     | 600     | 600     | 686     | 700     | 700     | 700     | 750     | 800     | 850     | 900     | 900                    | 900                     | 900                        | 6.4                         | 15.9                                  | 15.2    | 0.7     | -0.96   |
| 12   | 2        | Lean      | 400   | 400    | 400     | 457     | 500     | 600     | 600     | 600     | 686     | 700     | 700     | 700     | 750     | 800     | 850     | 900     | 900                    | 900                     | 900                        | 6.4                         | 15.9                                  | 15.2    | 0.7     | -0.96   |
| 19   | 2        | Lean      | 400   | 400    | 400     | 457     | 500     | 600     | 600     | 600     | 686     | 700     | 700     | 700     | 750     | 800     | 850     | 900     | 900                    | 900                     | 900                        | 6.4                         | 15.9                                  | 15.2    | 0.7     | -0.96   |
| 32   | 3        | Lean      | 600   | 600    | 600     | 675     | 750     | 900     | 900     | 793     | 686     | 700     | 700     | 700     | 750     | 800     | 850     | 900     | 900                    | 900                     | 900                        | 7.3                         | 18.3                                  | 17.4    | 0.8     | -0.96   |

\* with a concentration of 2381 ppm and 1710 ppm for normal and semi-western diets, respectively.

# with a concentration of 44 ppm in water.

‡ with a  $\delta^{26}\text{Mg}$  value of -0.97‰, -1.09‰ and -1.44‰ for normal diet, semi-western diet and water, respectively.

**Table S4: Diet formulation of standard milk replacer minipig diet.**

| Ingredient                      | Control<br>milk replacer<br>(Lactose) |
|---------------------------------|---------------------------------------|
| WPC-75%CP                       | 29.40%                                |
| Lactose                         | 24.05%                                |
| Vana Grasa 80C (coconut/malto)  | 18.28%                                |
| Vana-Grasa 80D (palmoil/whey)   | 18.23%                                |
| Maltodextrin 20 M500            | 2.45%                                 |
| Di-Potassium phosphate 17.7%P   | 1.47%                                 |
| Citric acid Anh West            | 0.98%                                 |
| Sodium chloride                 | 0.98%                                 |
| Calcium carbonate Pwd FineWhite | 0.74%                                 |
| SLOTEN 1942 PREMIX              | 0.49%                                 |
| Calcium formate 98% Fine        | 0.49%                                 |
| Calcium acetate 99% OAB         | 0.49%                                 |
| Magnesium sulphate Anh 20%      | 0.49%                                 |
| Emulsifier E487 silica          | 0.34%                                 |
| Potassium sorbate               | 0.33%                                 |
| DL-methionine 99% West          | 0.31%                                 |
| L-Lysine HCl 98%                | 0.18%                                 |
| L-Threonine 98%                 | 0.08%                                 |
| Silica Tix-O-Sil 38             | 0.06%                                 |
| L-Tryptophan 98%                | 0.06%                                 |
| Sweetener                       | 0.03%                                 |
| Vanilla Aroma                   | 0.03%                                 |
| Vit E 50% Adsorbate             | 0.02%                                 |
| Iron sulphate 1aq 30% min Fine  | 0.02%                                 |
| Copper sulphate 5aq 25% Fine    | 0.01%                                 |
|                                 | 0.00%                                 |
| <b>Total</b>                    | <b>100%</b>                           |

**Table S5: Diet formulation of high-energy, obesogenic diet (SK2\_2) and control, lean SDS minipig diet.**

|                                       | <b>SK2_2</b><br><b>0.5% cholesterol</b><br>% | <b>SDS SMP(E)</b><br><b>Standard Mini Pig Diet</b> |
|---------------------------------------|----------------------------------------------|----------------------------------------------------|
| Barley                                | 10.25                                        | *                                                  |
| Wheat                                 | 8.00                                         | *                                                  |
| Soja hulls RC 320-360                 | 35.93                                        | *                                                  |
| Potato protein                        | 3.69                                         |                                                    |
| Wheat gluten protein                  | 5.16                                         |                                                    |
| Sucrose                               | 20.00                                        |                                                    |
| Lard                                  | 8.50                                         |                                                    |
| Trans-fat soja oil                    | 4.00                                         |                                                    |
| Cholesterol                           | 0.50                                         |                                                    |
| Limestone, CaCO <sub>3</sub> (powder) | 1.35                                         |                                                    |
| Mono-Calcium phosphate                | 1.79                                         |                                                    |
| NaCl                                  | 0.62                                         |                                                    |
| Premix 2 g/kg                         | 0.20                                         |                                                    |
| L-Tryptophan                          | 0.01                                         |                                                    |
| <b>Total</b>                          | <b>100.00</b>                                |                                                    |
| Oat hulls and bran                    |                                              | *                                                  |
| Wheatfeed                             |                                              | *                                                  |
| De-hulled extracted toasted soya      |                                              | *                                                  |
| Molasses                              |                                              | *                                                  |
| Sunflower extracted                   |                                              | *                                                  |
| Macro minerals                        |                                              | *                                                  |
| Micro minerals                        |                                              | *                                                  |
| Vitamins                              |                                              | *                                                  |

**Table S6: Nutrient composition of the high-energy, obesogenic diet (OB) and control, lean SDS Minipig diet**

|                                |     | <b>OB</b>               | <b>SDS SMP(E)</b>             |
|--------------------------------|-----|-------------------------|-------------------------------|
|                                |     | <b>0.5% cholesterol</b> | <b>Standard Mini Pig Diet</b> |
| Dry matter                     | g   | 925.7                   | 900                           |
| Crude ash                      | g   | 58.9                    | 73.5                          |
| Crude protein                  | g   | 130.0                   | 130.3                         |
| Crude fat                      | g   | 137.6                   | 21.3                          |
| C18:2                          | g   | 12.5                    | 3.1                           |
| Crude fiber                    | g   | 127.6                   | 145.2                         |
| Digestible crude oil           | g   |                         | 12.0                          |
| Digestible crude protein       | g   |                         | 94.1                          |
| Starch (amylase method)        | g   | 102.4                   | 271.2                         |
| Sugars                         | g   | 222.9                   | 55.4                          |
| Non-starch polysaccharides     | g   | 279.8                   |                               |
| Nitrogen free extract          | g   |                         | 524.1                         |
| Total dietary fibre            | g   |                         | 296.6                         |
| EW                             | -   | 1.10                    |                               |
| Gross energy                   | MJ  |                         | 13.8                          |
| Digestible energy              | MJ  |                         | 11.43                         |
| Metabolisable energy           | MJ  |                         | 10.98                         |
| Net energy diet                | MJ  | 9.70                    |                               |
| Calcium                        | g   | 10.1                    | 10.1                          |
| Phosphorus                     | g   | 5.3                     | 5.9                           |
| Digestible phosphorus (faeces) | g   | 3.7                     | 3.7                           |
| Inositol-phosphate             | g   | 0.6                     |                               |
| Ca/digestible phosphorus       |     | 2.7                     |                               |
| Magnesium                      | g   | 1.1                     | 3.1                           |
| Sodium                         | g   | 2.6                     | 2.9                           |
| Potassium                      | g   | 6.0                     | 13.7                          |
| Chloride                       | g   | 4.2                     | 4.2                           |
| Electrolyte balance            | meq | 150                     |                               |
| Iron                           | mg  | 376                     | 161.59                        |
| Copper                         | mg  | 25                      | 17.73                         |
| Zinc                           | mg  | 94                      | 118.08                        |
| Cobalt                         | µg  |                         | 59.60                         |
| Iodine                         | µg  |                         | 62.68                         |
| Selenium                       | µg  |                         | 211.35                        |
| Fluorine                       | mg  |                         | 16.58                         |
| LYS                            | g   | 6.3                     | 6.3                           |
| MET                            | g   | 2.2                     | 1.8                           |
| CYS                            | g   | 2.5                     | 2.1                           |
| M+C                            | g   | 4.7                     | 3.9                           |
| THR                            | g   | 4.9                     | 4.9                           |
| TRP                            | g   | 1.6                     | 1.6                           |
| ILE                            | g   | 5.4                     | 5.3                           |
| ARG                            | g   | 6.1                     | 8.8                           |
| PHE                            | g   | 6.7                     | 6.2                           |
| HIS                            | g   | 3.0                     | 3.3                           |
| LEU                            | g   | 9.9                     | 9.2                           |
| TYR                            | g   | 5.5                     | 3.7                           |
| VAL                            | g   | 6.4                     | 6.4                           |
| ALA                            | g   | 5.1                     | 0.6                           |
| ASP                            | g   | 10.1                    | 5.07                          |
| GLU                            | g   | 27.2                    | 18.1                          |
| GLY                            | g   | 6.7                     | 10.0                          |
| PRO                            | g   | 10.6                    | 7.4                           |
| SER                            | g   | 6.7                     | 4.3                           |
| Cumulative AA                  | g   | 126.8                   |                               |
| Ileal digestible LYS           | g   | 4.6                     |                               |
| Ileal digestible MET           | g   | 1.9                     |                               |
| Ileal digestible CYS           | g   | 1.9                     |                               |
| Ileal digestible M+C           | g   | 3.7                     |                               |
| Ileal digestible THR           | g   | 3.6                     |                               |
| Ileal digestible TRP           | g   | 1.2                     |                               |
| Ileal digestible ILE           | g   | 4.4                     |                               |
| Ileal digestible ARG           | g   | 5.3                     |                               |
| Ileal digestible PHE           | g   | 5.7                     |                               |
| Ileal digestible HIS           | g   | 2.3                     |                               |
| Ileal digestible LEU           | g   | 8.3                     |                               |
| Ileal digestible TYR           | g   | 4.4                     |                               |
| Ileal digestible VAL           | g   | 5.0                     |                               |

Supplementary reference:

- S1 E. D. Young, A. Galy, H. Nagahara, Kinetic and equilibrium mass-dependent isotope fractionation laws in nature and their geochemical and cosmochemical significance. *Geochim Cosmochim Acta.* **66**, 1095-1104 (2002).
